# Supplementary material
Source: Elsevier journal article supplement (https://www.sciencedirect.com/science/article/pii/S1665268119321933)
Supplement: mmc1 [file S1665268119321933:mmc1.docx]

**Online Supplementary Data**

**Search Strategy**

Database: Ovid MEDLINE

1. sarcopenia.mp. or exp sarcopenia/

2. muscular atrophy.mp. or exp muscular atrophy/

3. frailty.mp. or exp frailty/

4. muscle strength.mp. or exp muscle strength/

5. lean body weight.mp.

6. or/1-5

7. hepatic encephalopathy.mp. or exp hepatic encephalopathy/

8. altered mental status.mp.

9. cognitive defect.mp. or exp cognition disorders/

10. hepatic coma.mp.

11. or/7-10

12. 6 and 11

Database: EMBASE

1. sarcopenia or ‘sarcopenia’/exp

2. ‘muscle atrophy’ or ‘muscle atrophy’/exp

3. frailty or ‘frailty’/exp

4. ‘muscle mass’ or ‘muscle mass’/exp

5. ‘lean body weight’ or ‘lean body weight’/exp

6. or/1-5

7. ‘hepatic encephalopathy’ or ‘hepatic encephalopathy’/exp

8. ‘altered mental status’ or ‘altered mental status’/exp

9. ‘cognitive defect’ or ‘cognitive defect’/exp

10. ‘hepatic coma’ or ‘hepatic coma’/exp

11. or/7-10

12. 6 and 11
